# Supplementary material for: Composite nanoplatelets combining soft-magnetic iron oxide with hard-magnetic barium hexaferrite
Source: Royal Society of Chemistry journal article supplement (doi:10.1039/c4nr05854b), 2014-12-30
Supplement: c4nr05854b2.pdf [file c4nr05854b2.pdf]

*Composite Nanoplatelets Combining Soft-Magnetic Iron-Oxide with Hard-Magnetic Barium Hexaferrite*  
(Supplementary Information #2)

## **Supplementary Information # 2: Properties of barium hexaferrite core nanoparticles**

### **Nanoparticles BaM<sub>10-70</sub>**

The BaM<sub>10-70</sub> nanoparticles displayed a bimodal size distribution (Figures 1 (a) and (b)). While the majority of the nanoparticles are in the form of ultrafine discoid nanoparticles, up to 10 nm wide but only approximately 3 nm thick, larger platelet crystals, up to 100 nm wide and approximately 4 nm thick, were also present.

### **Nanoparticles BaM<sub>10</sub>**

The ultrafine, discoid nanoparticles BaM<sub>10</sub> were up to 10 nm wide and approximately 3 nm thick (Figures S2 (c) and (d))

### **Nanoparticles BaM<sub>100</sub>**

The largest nanoparticles BaM<sub>100</sub> were hexagonal platelets with relatively uniform sizes, ~100 nm wide and ~8 nm thick (Figures S2 (e) and (f)).

Composite Nanoplatelets Combining Soft-Magnetic Iron-Oxide with Hard-Magnetic Barium Hexaferrite  
(Supplementary Information #2)

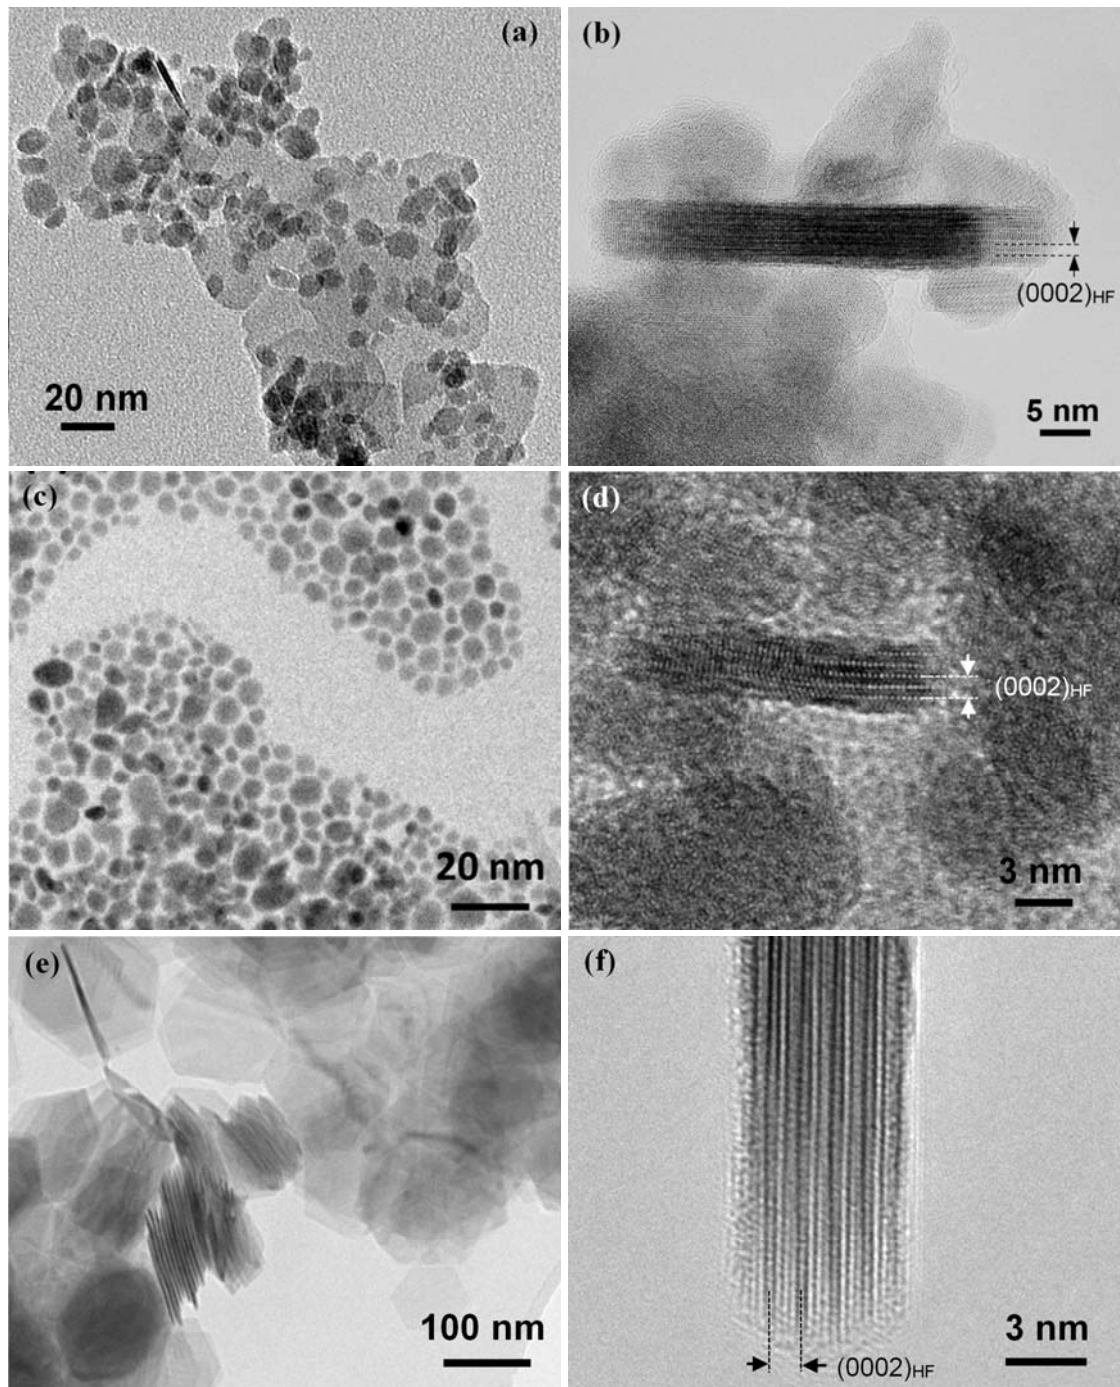

Figure S2: Ba-hexaferrite core nanoparticles BaM<sub>10-70</sub> (TEM image (a) and HREM image of larger platelet nanoparticle oriented with the large surfaces parallel to the electron beam (b)), nanoparticles BaM<sub>10</sub> (TEM image (c) and HREM image (d)), and nanoparticles BaM<sub>100</sub> (TEM image (e) and HREM image (f)).
